# Supplementary material for: Autonomous vehicle surveillance through fuzzy C-means segmentation and DeepSORT on aerial images
Source: PeerJ journal article supplement (doi:10.7717/peerj-cs.2835), 2025-05-01
Supplement: Computing_infrastructure.docx [file Computing_infrastructure.docx]

**Computing infrastructure**

The experiments were conducted on a PC equipped with an x64-based Windows 10 operating system, an Intel Core i5-4010U 2.70.GHz CPU, 8GB RAM. The system’s performance was evaluated using two benchmark datasets: UAVDT dataset and KIT-AIS dataset.

.
