# Supplementary material for: Autonomous vehicle surveillance through fuzzy C-means segmentation and DeepSORT on aerial images
Source: PeerJ journal article supplement (doi:10.7717/peerj-cs.2835), 2025-05-01
Supplement: Dataset.docx [file Dataset.docx]

**UAVDT Dataset**

https://paperswithcode.com/dataset/uavdt

**KIT AIS Dataset**

https://mldta.com/dataset/kit-ais-dataset/
