# Supplementary figures and images for: Autonomous vehicle surveillance through fuzzy C-means segmentation and DeepSORT on aerial images
Source: PeerJ journal article supplement (doi:10.7717/peerj-cs.2835), 2025-05-01

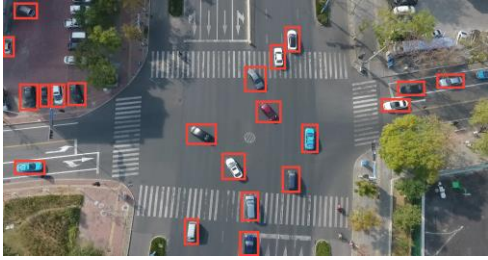

(Updated result of UAVDT in Fig 7)

Supplement: FigS2_StaffSS.pdf [file FigS2_StaffSS.pdf]
